# Supplementary material for: Slow magnetic relaxation in a Dy3 triangle and a bistriangular Dy6 cluster
Source: Royal Society of Chemistry journal article supplement (doi:10.1039/d1dt03414f), 2022-01-01
Supplement: d1dt03414f1.pdf [file d1dt03414f1.pdf]

## **Slow Magnetic Relaxation in a Dy<sub>3</sub> Triangle and a Bistriangle Dy<sub>6</sub> Cluster**

Wen Wang,<sup>a</sup> Tao Shang,<sup>c</sup> Juan Wang,<sup>a</sup> Bin-Ling Yao<sup>b</sup>, Li-Cun Li,<sup>a</sup> Yue Ma,<sup>\*a</sup> Qing-  
Lun Wang,<sup>a</sup> Yuan-Zhu Zhang,<sup>\*b</sup> Yi-Quan Zhang,<sup>\*c</sup> and Bin Zhao<sup>a</sup>

## Crystal Data and Structures

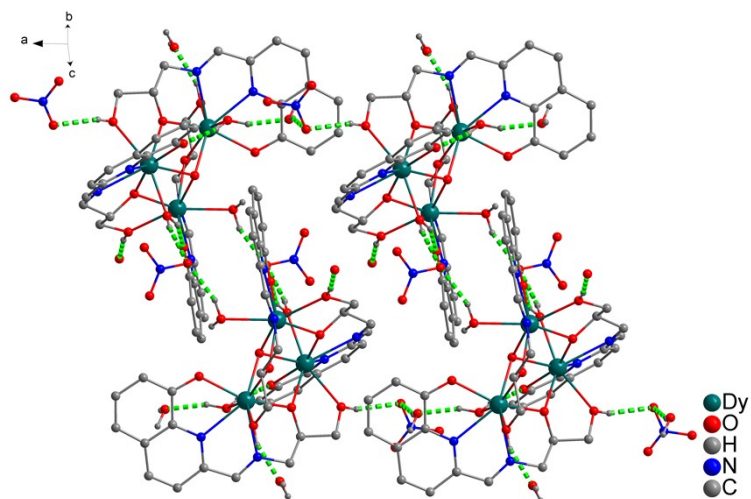

**Fig. S1.** Packing diagram of complex **1** along a axis. The green dashed line indicates the intramolecular hydrogen bond.

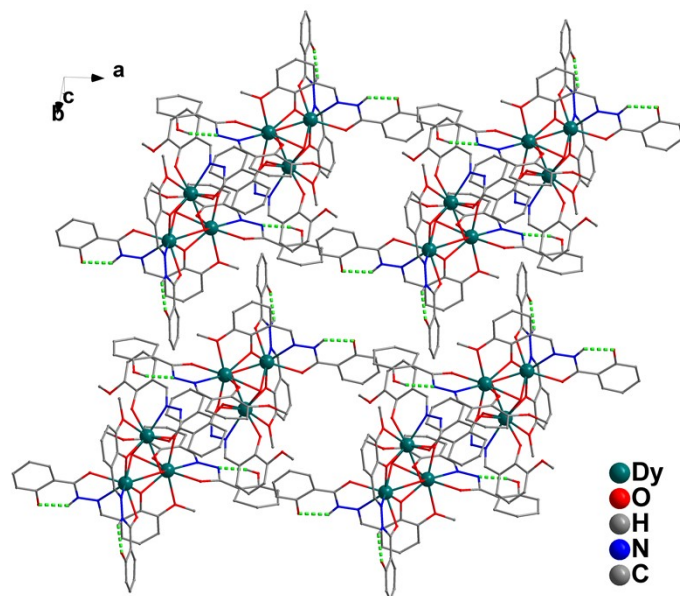

**Fig. S2.** Packing diagram of complex **2** along b axis. The green dashed line indicates the intramolecular hydrogen bond.

**Table S1.** Dy<sup>III</sup> Geometry Analysis by Using the SHAPE Software for **1**.

| Dy <sup>III</sup> | D <sub>2d</sub> -TDD-8 | C <sub>2v</sub> - BTPR-8 | C <sub>2v</sub> - JBTPR-8 |
|-------------------|------------------------|--------------------------|---------------------------|
| Dy1               | <b>1.999</b>           | 2.269                    | 2.917                     |
| Dy2               | <b>2.027</b>           | 2.255                    | 2.867                     |
| Dy3               | 2.245                  | <b>1.832</b>             | 2.592                     |

TDD-8 = Triangular dodecahedron; BTPR-8 = Biaugmented trigonal prism; JBTPR-8 = Biaugmented trigonal prism J50.

**Table S2.** Dy<sup>III</sup> Geometry Analysis by Using the SHAPE Software for **2**.

| Dy <sup>III</sup> | D <sub>2d</sub> -TDD-8 | C <sub>2v</sub> - BTPR-8 | C <sub>2v</sub> - JBTPR-8 |
|-------------------|------------------------|--------------------------|---------------------------|
| Dy1               | 2.902                  | 2.579                    | <b>2.372</b>              |
| Dy2               | <b>3.243</b>           | 4.237                    | 3.955                     |
| Dy3               | 3.326                  | <b>1.805</b>             | 2.726                     |

TDD-8 = Triangular dodecahedron; BTPR-8 = Biaugmented trigonal prism; JBTPR-8 = Biaugmented trigonal prism J50.

**Table S3.** Selected bond lengths [ $\text{\AA}$ ] and angles [ $^\circ$ ] for **1**.

| Bond Lengths |           |         |           |
|--------------|-----------|---------|-----------|
| Dy1-O6       | 2.268(5)  | Dy2-O11 | 2.420(7)  |
| Dy1-O9       | 2.319(5)  | Dy2-O7  | 2.425(6)  |
| Dy1-O5       | 2.322(5)  | Dy2-N1  | 2.466(7)  |
| Dy1-O1       | 2.366(5)  | Dy2-N2  | 2.526(7)  |
| Dy1-O12      | 2.426(5)  | Dy2-Dy3 | 3.7305(7) |
| Dy1-O10      | 2.438(6)  | Dy3-O9  | 2.256(6)  |
| Dy1-N5       | 2.466(6)  | Dy3-O8  | 2.303(7)  |
| Dy1-N6       | 2.486(7)  | Dy3-O3  | 2.309(5)  |
| Dy1-Dy3      | 3.7550(6) | Dy3-O1  | 2.362(5)  |
| Dy1-Dy2      | 3.7814(8) | Dy3-N3  | 2.447(7)  |
| Dy2-O3       | 2.277(5)  | Dy3-O13 | 2.457(6)  |
| Dy2-O2       | 2.283(5)  | Dy3-O4  | 2.459(6)  |
| Dy2-O6       | 2.310(6)  | Dy3-N4  | 2.490(8)  |
| Dy2-O1       | 2.378(5)  |         |           |

  

| Bond angles |           |            |          |
|-------------|-----------|------------|----------|
| O6-Dy1-O9   | 89.46(18) | O11-Dy2-O7 | 146.5(2) |
| O6-Dy1-O5   | 158.5(2)  | O3-Dy2-N1  | 128.5(2) |
| O9-Dy1-O5   | 85.82(18) | O2-Dy2-N1  | 67.1(2)  |
| O6-Dy1-O1   | 71.56(19) | O6-Dy2-N1  | 128.7(2) |
| O9-Dy1-O1   | 71.22(19) | O1-Dy2-N1  | 141.5(2) |
| O5-Dy1-O1   | 87.05(19) | O11-Dy2-N1 | 77.0(2)  |
| O6-Dy1-O12  | 82.85(19) | O7-Dy2-N1  | 73.5(2)  |

|             |            |            |            |
|-------------|------------|------------|------------|
| O9-Dy1-O12  | 144.6(2)   | O3-Dy2-N2  | 67.0(2)    |
| O5-Dy1-O12  | 88.89(19)  | O2-Dy2-N2  | 130.3(2)   |
| O1-Dy1-O12  | 73.57(18)  | O6-Dy2-N2  | 129.4(2)   |
| O6-Dy1-O10  | 104.2(2)   | O1-Dy2-N2  | 135.7(2)   |
| O9-Dy1-O10  | 65.9(2)    | O11-Dy2-N2 | 77.7(2)    |
| O5-Dy1-O10  | 93.0(2)    | O7-Dy2-N2  | 75.1(2)    |
| O1-Dy1-O10  | 136.99(18) | N1-Dy2-N2  | 63.2(2)    |
| O12-Dy1-O10 | 149.43(19) | O9-Dy3-O8  | 151.9(2)   |
| O6-Dy1-N5   | 128.8(2)   | O9-Dy3-O3  | 92.8(2)    |
| O9-Dy1-N5   | 133.51(19) | O8-Dy3-O3  | 89.1(2)    |
| O5-Dy1-N5   | 66.9(2)    | O9-Dy3-O1  | 72.37(19)  |
| O1-Dy1-N5   | 138.8(2)   | O8-Dy3-O1  | 81.4(2)    |
| O12-Dy1-N5  | 74.54(19)  | O3-Dy3-O1  | 73.31(18)  |
| O10-Dy1-N5  | 78.2(2)    | O9-Dy3-N3  | 128.1(2)   |
| O6-Dy1-N6   | 68.0(2)    | O8-Dy3-N3  | 68.0(3)    |
| O9-Dy1-N6   | 128.4(2)   | O3-Dy3-N3  | 130.1(2)   |
| O5-Dy1-N6   | 130.1(2)   | O1-Dy3-N3  | 139.1(2)   |
| O1-Dy1-N6   | 133.8(2)   | O9-Dy3-O13 | 79.5(2)    |
| O12-Dy1-N6  | 80.2(2)    | O8-Dy3-O13 | 85.6(2)    |
| O10-Dy1-N6  | 75.4(2)    | O3-Dy3-O13 | 151.45(19) |
| N5-Dy1-N6   | 63.2(2)    | O1-Dy3-O13 | 78.16(19)  |
| O3-Dy2-O2   | 158.89(19) | N3-Dy3-O13 | 73.1(2)    |
| O3-Dy2-O6   | 93.0(2)    | O9-Dy3-O4  | 111.1(2)   |
| O2-Dy2-O6   | 83.53(19)  | O8-Dy3-O4  | 95.3(2)    |

|            |            |            |            |
|------------|------------|------------|------------|
| O3-Dy2-O1  | 73.60(18)  | O3-Dy3-O4  | 65.77(19)  |
| O2-Dy2-O1  | 85.66(19)  | O1-Dy3-O4  | 139.00(19) |
| O6-Dy2-O1  | 70.65(19)  | N3-Dy3-O4  | 72.7(2)    |
| O3-Dy2-O11 | 80.7(2)    | O13-Dy3-O4 | 142.64(19) |
| O2-Dy2-O11 | 91.0(2)    | O9-Dy3-N4  | 67.9(2)    |
| O6-Dy2-O11 | 147.2(2)   | O8-Dy3-N4  | 132.2(2)   |
| O1-Dy2-O11 | 76.7(2)    | O3-Dy3-N4  | 123.8(2)   |
| O3-Dy2-O7  | 105.7(2)   | O1-Dy3-N4  | 136.9(2)   |
| O2-Dy2-O7  | 91.9(2)    | N3-Dy3-N4  | 64.3(3)    |
| O6-Dy2-O7  | 66.21(19)  | O13-Dy3-N4 | 78.9(2)    |
| O1-Dy2-O7  | 136.78(19) | O4-Dy3-N4  | 73.1(2)    |

**Table S4.** Hydrogen bond lengths [ $\text{\AA}$ ] and angles [ $^\circ$ ] for **1**.

| D-H $\cdots$ A         | $d(\text{D-H})$ | $d(\text{H}\cdots\text{A})$ | $d(\text{D}\cdots\text{A})$ | $\angle(\text{DHA})$ |
|------------------------|-----------------|-----------------------------|-----------------------------|----------------------|
| O12-H12a $\cdots$ O6   | 0.8800          | 1.8000                      | 2.646(7)                    | 161.00               |
| O12-H12b $\cdots$ O6   | 0.8900          | 1.8100                      | 2.675(4)                    | 162.00               |
| O9-H9 $\cdots$ O21     | 0.8600          | 1.8800                      | 2.704(6)                    | 160.00               |
| O7-H7 $\cdots$ O18a    | 0.7300          | 2.0800                      | 2.794(7)                    | 165.00               |
| O5-H5 $\cdots$ O20     | 0.8500          | 1.8500                      | 2.699(6)                    | 172.00               |
| O11-H11a $\cdots$ O15  | 0.8500          | 2.1100                      | 2.922(5)                    | 158.00               |
| O11-H11b $\cdots$ O10  | 0.8700          | 1.8500                      | 2.662(4)                    | 156.00               |
| O13-H13a $\cdots$ O15  | 0.8500          | 1.9800                      | 2.799(6)                    | 161.00               |
| O22-H22a $\cdots$ O18a | 0.8500          | 1.9700                      | 2.794(3)                    | 162.00               |

**Table S5.** Selected bond lengths [ $\text{\AA}$ ] and angles [ $^\circ$ ] for **2**.

| Bond Lengths |           |          |           |
|--------------|-----------|----------|-----------|
| Dy1-O1       | 2.575(10) | Dy2-O8   | 2.369(10) |
| Dy1-O2       | 2.093(9)  | Dy2-O12  | 2.371(10) |
| Dy1-O3       | 2.182(9)  | Dy2-N3   | 2.432(12) |
| Dy1-O5       | 2.244(10) | Dy2-N6   | 2.359(13) |
| Dy1-O6       | 2.667(11) | Dy3-O1   | 2.238(9)  |
| Dy1-O7       | 2.372(10) | Dy3-O2   | 2.802(11) |
| Dy1-N2       | 2.413(10) | Dy3-O12  | 2.344(10) |
| Dy1-O4#1     | 2.546(10) | Dy3-O13  | 2.579(10) |
| Dy2-O1       | 2.475(10) | Dy3-O16  | 2.113(10) |
| Dy2-O2       | 2.364(9)  | Dy3-O14  | 2.393(13) |
| Dy2-O7       | 2.204(9)  | Dy3-N7   | 2.665(14) |
| Dy2-O10      | 2.536(12) | Dy3-O4#1 | 2.288(9)  |

  

| Bond angles |          |             |          |
|-------------|----------|-------------|----------|
| O1-Dy1-O6   | 132.6(3) | O8-Dy2-O10  | 121.4(4) |
| O2-Dy1-O1   | 63.7(3)  | O8-Dy2-O12  | 72.0(4)  |
| O2-Dy1-O3   | 136.2(4) | O8-Dy2-N3   | 65.4(4)  |
| O2-Dy1-O5   | 88.9(4)  | O12-Dy2-O1  | 65.6(3)  |
| O2-Dy1-O6   | 114.2(4) | O12-Dy2-O10 | 134.3(4) |
| O2-Dy1-O7   | 75.5(3)  | O12-Dy2-N3  | 137.1(4) |
| O2-Dy1-N2   | 148.3(3) | N3-Dy2-O1   | 108.0(4) |
| O2-Dy1-O4#1 | 81.0(4)  | N3-Dy2-O10  | 76.2(5)  |
| O3-Dy1-O1   | 73.6(3)  | N6-Dy2-O1   | 146.5(4) |

|             |          |              |          |
|-------------|----------|--------------|----------|
| O3-Dy1-O5   | 134.9(3) | N6-Dy2-O2    | 106.8(4) |
| O3-Dy1-O6   | 87.1(4)  | N6-Dy2-O10   | 61.5(4)  |
| O3-Dy1-O7   | 83.6(4)  | N6-Dy2-O8    | 80.6(4)  |
| O3-Dy1-N2   | 68.4(3)  | N6-Dy2-O12   | 80.9(4)  |
| O3-Dy1-O4#1 | 92.1(3)  | N6-Dy2-N3    | 96.9(5)  |
| O5-Dy1-O1   | 148.4(3) | O1-Dy3-O2    | 58.2(3)  |
| O5-Dy1-O6   | 71.4(4)  | O1-Dy3-O12   | 69.9(3)  |
| O5-Dy1-O7   | 116.4(4) | O1-Dy3-O13   | 114.7(3) |
| O5-Dy1-N2   | 69.5(4)  | O1-Dy3-O14   | 87.1(4)  |
| O5-Dy1-O4#1 | 94.5(4)  | O1-Dy3-N7    | 140.4(4) |
| O7-Dy1-O1   | 73.7(3)  | O1-Dy3-O4#1  | 77.6(3)  |
| O7-Dy1-O6   | 61.2(3)  | O12-Dy3-O2   | 63.4(3)  |
| O7-Dy1-N2   | 134.5(3) | O12-Dy3-O13  | 70.3(4)  |
| O7-Dy1-O4#1 | 140.2(3) | O12-Dy3-O14  | 117.5(4) |
| N2-Dy1-O1   | 126.7(4) | O12-Dy3-N7   | 142.6(4) |
| N2-Dy1-O6   | 81.6(4)  | O13-Dy3-O2   | 132.5(3) |
| N2-Dy1-O4#1 | 78.0(3)  | O13-Dy3-N7   | 75.3(4)  |
| O4#1-Dy1-O1 | 67.2(3)  | O16-Dy3-O1   | 137.4(4) |
| O4#1-Dy1-O6 | 158.3(3) | O16-Dy3-O2   | 79.2(4)  |
| O1-Dy2-O10  | 145.5(3) | O16-Dy3-O12  | 93.6(4)  |
| O2-Dy2-O1   | 62.1(3)  | O16-Dy3-O13  | 94.3(4)  |
| O2-Dy2-O10  | 95.2(4)  | O16-Dy3-O14  | 134.0(4) |
| O2-Dy2-O8   | 139.9(4) | O16-Dy3-N7   | 74.8(4)  |
| O2-Dy2-O12  | 70.5(3)  | O16-Dy3-O4#1 | 89.0(4)  |



|            |          |              |          |
|------------|----------|--------------|----------|
| O2-Dy2-N3  | 147.1(4) | O14-Dy3-O2   | 143.7(3) |
| O7-Dy2-O1  | 78.6(4)  | O14-Dy3-O13  | 68.7(4)  |
| O7-Dy2-O2  | 73.7(3)  | O14-Dy3-N7   | 59.9(4)  |
| O7-Dy2-O10 | 69.7(4)  | N7-Dy3-O2    | 143.4(4) |
| O7-Dy2-O8  | 131.2(4) | O4#1-Dy3-O2  | 72.3(3)  |
| O7-Dy2-O12 | 137.9(4) | O4#1-Dy3-O12 | 134.2(4) |
| O7-Dy2-N3  | 73.6(4)  | O4#1-Dy3-O13 | 155.1(4) |
| O7-Dy2-N6  | 131.1(4) | O4#1-Dy3-O14 | 91.4(4)  |
| O8-Dy2-O1  | 89.6(4)  | O4#1-Dy3-N7  | 81.8(4)  |

---

Symmetry codes: #1 -x+2,-y+2,-z

**Table S6.** Hydrogen bond lengths [Å] and angles [°] for **2**.

| D-H···A      | <i>d</i> (D-H) | <i>d</i> (H···A) | <i>d</i> (D···A) | ∠(DHA) |
|--------------|----------------|------------------|------------------|--------|
| N5-H5···O11  | 0.8800         | 2.0300           | 2.644(12)        | 126.00 |
| N4-H4···O9   | 0.8800         | 1.8700           | 2.541(10)        | 131.00 |
| O15-H15···N8 | 0.8200         | 2.0600           | 2.728(14)        | 139.00 |

---

## Magnetic characterization

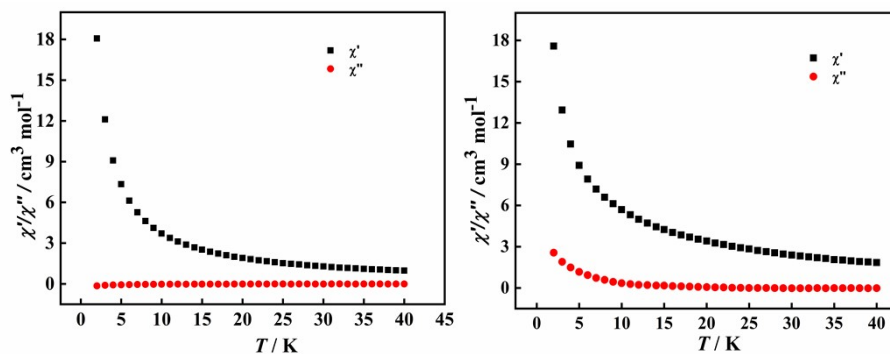

**Fig. S3.** Temperature dependence of the  $\chi'$  and  $\chi''$  ac magnetic susceptibilities for complexes **1** and **2** in 1000 Hz under zero dc field.

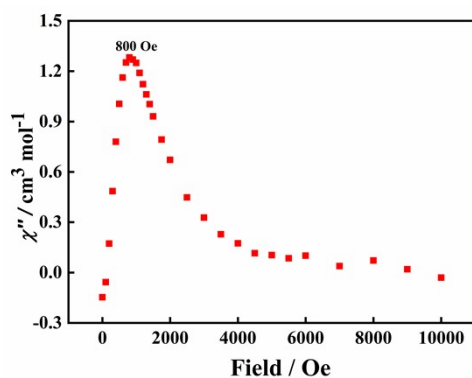

**Fig. S4.** The field dependence of the  $\chi''$  ac magnetic susceptibilities for complex **1** at 1.9 K, 997 Hz.

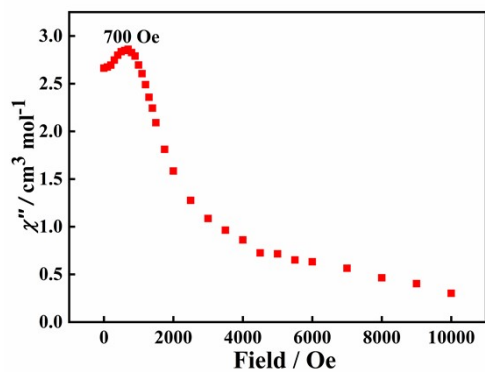

**Fig. S5.** The field dependence of the  $\chi''$  ac magnetic susceptibilities for complex **2** at 1.9 K, 997 Hz.

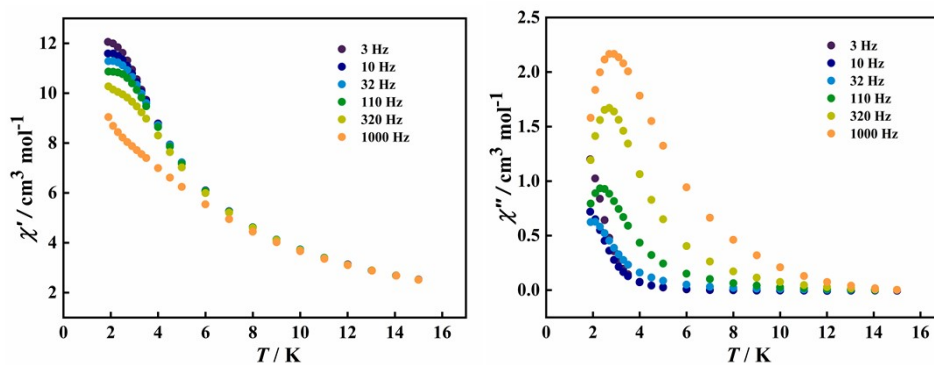

**Fig. S6.** The temperature dependence of the  $\chi'$  and  $\chi''$  ac magnetic susceptibilities for complex **1** measured under 800 Oe dc field.

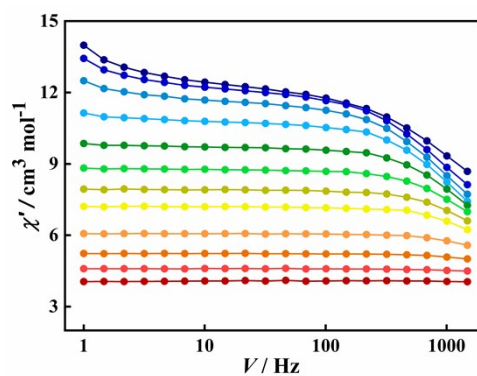

**Fig. S7.** Frequency dependence of the  $\chi'$  ac magnetic susceptibilities for complex **1** measured at 1.9-9.0 K under 800 Oe dc field.

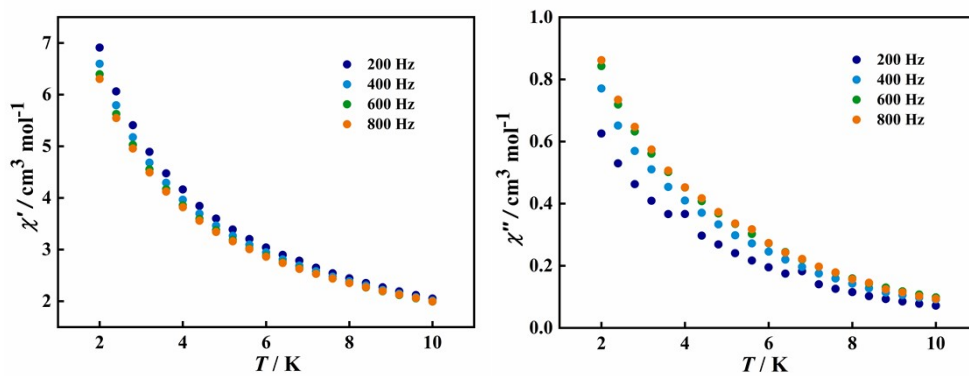

**Fig. S8.** The temperature dependence of the  $\chi'$  and  $\chi''$  ac magnetic susceptibilities for complex **2** measured under 700 Oe dc field.

**Table S7.** Fitted parameters  $\alpha$  with Debye model under 1.9 K-9.0 K for complexes **1**.

| Temperature/K | $\alpha_1$ | $\alpha_2$ |
|---------------|------------|------------|
| 1.9           | 0.4128     | 0.2141     |
| 2.2           | 0.4032     | 0.2032     |
| 2.5           | 0.3222     | 0.1962     |
| 3.0           | 0.3463     | 0.1384     |
| 3.5           | 0.2359     | 0.1198     |
| 4.0           | 0.1033     | 0.1035     |
| 4.5           | 0.0715     | 0.0719     |
| 5.0           | 0.0692     | 0.0357     |
| 6.0           | 0.0292     | 0.0211     |
| 7.0           | 0.0300     | 0.0010     |
| 8.0           | 0.0432     | 0.0010     |
| 9.0           | 0.0100     | 1.3962E-14 |

## Computational details

Complex **1** has three magnetic center Dy<sup>III</sup> ions and **2** has six ones. Considering the centrosymmetric structure of complex **2**, we extracted the model structure only including three Dy<sup>III</sup> ions on the one hand (see Fig. S9). For each of **1** and **2**, three types of **Dy1**, **Dy2** and **Dy3** fragments shown in Figure S1 would be calculated by us to investigate their magnetic properties. Complete-active-space self-consistent field (CASSCF) calculations on three types of individual Dy<sup>III</sup> fragments for each complex have been carried out with OpenMolcas<sup>S1</sup> program package. **1\_Dy1**, **1\_Dy2** and **1\_Dy3** were calculated respectively keeping the experimentally determined structures of the corresponding compounds while replacing the other Dy<sup>III</sup> ions with diamagnetic Lu<sup>III</sup>. In the calculations of **2\_Dy1**, **2\_Dy2** and **2\_Dy3**, the nearest Dy<sup>III</sup> ions were replaced by diamagnetic Lu<sup>III</sup>, and two Dy<sup>III</sup> ions on the other side were taken into account by the closed-shell La<sup>III</sup> ab initio embedding model potentials (AIMP; La.ECP.deGraaf.0s.0s.0e-La-(LaMnO3.)).<sup>S2</sup>

The basis sets for all atoms are atomic natural orbitals from the ANO-RCC library: ANO-RCC-VTZP for Dy<sup>III</sup>; VTZ for close N and O; VDZ for distant atoms. The calculations employed the second order Douglas-Kroll-Hess Hamiltonian, where scalar relativistic contractions were taken into account in the basis set and the spin-orbit couplings were handled separately in the restricted active space state interaction (RASSI-SO) procedure.<sup>S3-S4</sup> For each individual Dy<sup>III</sup> fragment, active electrons in 7 active orbitals include all *f* electrons (CAS(9 in 7 for Dy<sup>III</sup>)) in the CASSCF calculation. To exclude all the doubts, we calculated all the roots in the active space. We have mixed the maximum number of spin-free state which was possible with our hardware (all from 21 sextets, 128 from 224 quadruplets, 130 from 490 doublets) for each fragment. SINGLE\_ANISO<sup>S5-S7</sup> program was used to obtain the energy levels, *g* tensors, magnetic axes, *et al.* based on the above CASSCF/RASSI-SO calculations.

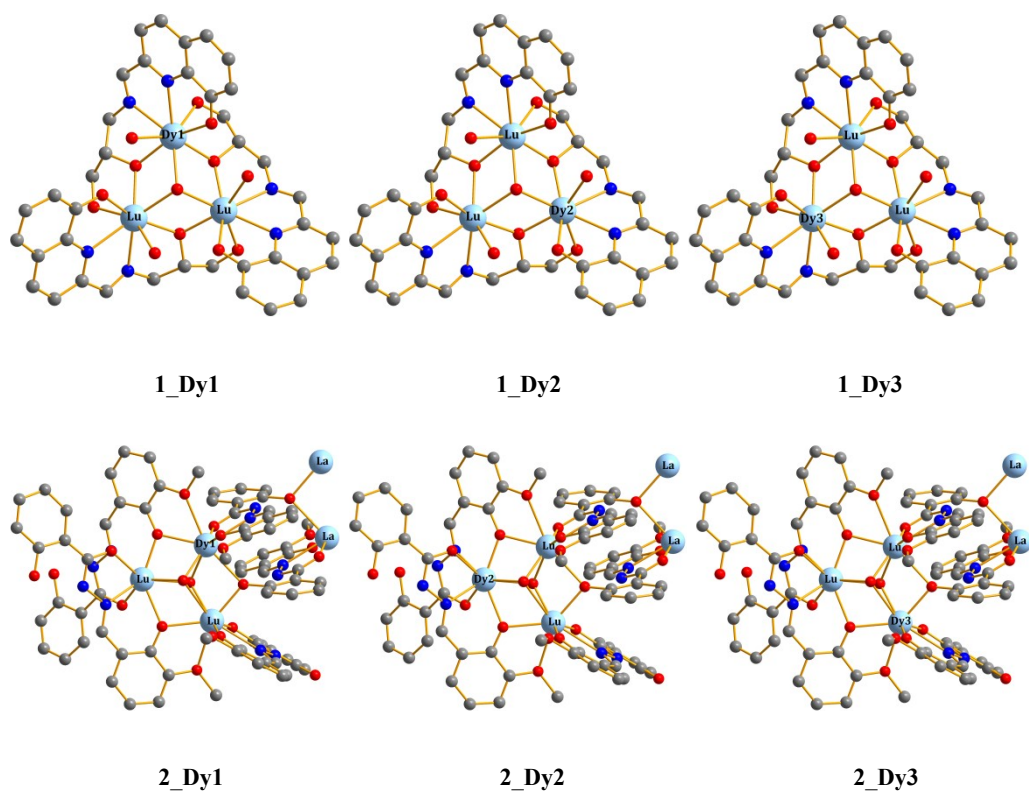

**Figure S9.** Calculated model structures of individual Dy<sup>III</sup> fragments of complexes **1** and **2**; H atoms are omitted for clarify.

**Table S8.** Calculated energy levels ( $\text{cm}^{-1}$ ),  $\mathbf{g}$  ( $g_x$ ,  $g_y$ ,  $g_z$ ) tensors of the lowest eight Kramers doublets (KDs) of individual Dy<sup>III</sup> fragments for complexes **1** and **2** using CASSCF/RASSI-SO with OpenMolcas.

| KDs | 1_Dy1              |              | 1_Dy2              |              | 1_Dy3              |              |
|-----|--------------------|--------------|--------------------|--------------|--------------------|--------------|
|     | $E/\text{cm}^{-1}$ | $\mathbf{g}$ | $E/\text{cm}^{-1}$ | $\mathbf{g}$ | $E/\text{cm}^{-1}$ | $\mathbf{g}$ |
| 1   |                    | 0.007        |                    | 0.022        |                    | 0.013        |
|     | 0.0                | 0.011        | 0.0                | 0.031        | 0.0                | 0.021        |
|     |                    | 19.649       |                    | 19.623       |                    | 19.628       |
| 2   |                    | 0.370        |                    | 0.820        |                    | 0.554        |
|     | 211.3              | 1.050        | 191.9              | 2.201        | 190.6              | 1.849        |
|     |                    | 16.036       |                    | 15.265       |                    | 15.476       |

|     |                          |                 |                          |                 |                          |                 |
|-----|--------------------------|-----------------|--------------------------|-----------------|--------------------------|-----------------|
| 3   | 268.1                    | 0.529           | 247.5                    | 0.964           | 235.7                    | 0.886           |
|     |                          | 0.692           |                          | 1.572           |                          | 1.109           |
|     |                          | 17.966          |                          | 16.501          |                          | 17.228          |
| 4   | 416.5                    | 1.054           | 378.3                    | 2.132           | 388.4                    | 1.157           |
|     |                          | 1.335           |                          | 3.277           |                          | 1.524           |
|     |                          | 12.655          |                          | 11.907          |                          | 12.838          |
| 5   | 462.2                    | 1.685           | 430.0                    | 0.354           | 438.8                    | 1.410           |
|     |                          | 3.013           |                          | 4.112           |                          | 2.938           |
|     |                          | 13.481          |                          | 12.112          |                          | 12.751          |
| 6   | 515.9                    | 4.743           | 476.4                    | 4.459           | 496.1                    | 4.738           |
|     |                          | 6.354           |                          | 6.757           |                          | 6.677           |
|     |                          | 10.440          |                          | 9.392           |                          | 10.138          |
| 7   | 607.2                    | 0.419           | 569.3                    | 0.568           | 590.1                    | 0.481           |
|     |                          | 0.700           |                          | 0.860           |                          | 0.639           |
|     |                          | 16.921          |                          | 16.704          |                          | 16.863          |
| 8   | 740.2                    | 0.069           | 711.0                    | 0.059           | 700.2                    | 0.087           |
|     |                          | 0.180           |                          | 0.154           |                          | 0.233           |
|     |                          | 19.397          |                          | 19.444          |                          | 19.353          |
| KDs | <b>2_Dy1</b>             |                 | <b>2_Dy2</b>             |                 | <b>2_Dy3</b>             |                 |
|     | <i>E/cm<sup>-1</sup></i> | <b><i>g</i></b> | <i>E/cm<sup>-1</sup></i> | <b><i>g</i></b> | <i>E/cm<sup>-1</sup></i> | <b><i>g</i></b> |
| 1   | 0.0                      | 0.008           | 0.0                      | 0.031           | 0.0                      | 0.003           |
|     |                          | 0.015           |                          | 0.062           |                          | 0.004           |
|     |                          | 19.744          |                          | 19.707          |                          | 19.761          |



|   |       |        |       |        |       |        |
|---|-------|--------|-------|--------|-------|--------|
| 2 | 188.6 | 0.313  | 67.6  | 0.131  | 264.1 | 0.076  |
|   |       | 0.577  |       | 0.234  |       | 0.103  |
|   |       | 17.619 |       | 17.506 |       | 16.906 |
| 3 | 297.9 | 2.919  | 158.0 | 2.884  | 448.9 | 1.153  |
|   |       | 5.474  |       | 5.833  |       | 5.615  |
|   |       | 10.439 |       | 13.090 |       | 12.415 |
| 4 | 376.1 | 7.648  | 200.6 | 3.125  | 477.2 | 8.326  |
|   |       | 6.494  |       | 4.968  |       | 5.655  |
|   |       | 1.373  |       | 7.912  |       | 2.333  |
| 5 | 486.6 | 1.659  | 250.4 | 1.661  | 556.9 | 3.567  |
|   |       | 2.336  |       | 2.873  |       | 4.594  |
|   |       | 11.503 |       | 16.003 |       | 12.314 |
| 6 | 581.7 | 0.399  | 317.9 | 8.613  | 604.5 | 2.657  |
|   |       | 0.475  |       | 4.824  |       | 3.396  |
|   |       | 17.687 |       | 0.905  |       | 11.094 |
| 7 | 695.3 | 0.033  | 366.3 | 1.968  | 692.7 | 1.100  |
|   |       | 0.149  |       | 5.231  |       | 1.349  |
|   |       | 17.126 |       | 13.592 |       | 16.183 |
| 8 | 791.6 | 0.038  | 569.5 | 0.021  | 812.6 | 0.037  |
|   |       | 0.078  |       | 0.029  |       | 0.100  |
|   |       | 18.687 |       | 19.379 |       | 19.629 |

**Table S9.** Wave functions with definite projection of the total moment  $|m_J\rangle$  for the lowest two KDs of individual Dy<sup>III</sup> fragments for complexes **1** and **2** using CASSCF/RASSI-SO with OpenMolcas.

|  | $E/\text{cm}^{-1}$ | wave functions |
|--|--------------------|----------------|
|--|--------------------|----------------|

|              |       |                                                             |
|--------------|-------|-------------------------------------------------------------|
| <b>1_Dy1</b> | 0.0   | 96.3% ±15/2>                                                |
|              | 211.3 | 88.7% ±13/2>+3.5% ±9/2>                                     |
|              | 268.1 | 49.8% ±1/2>+30.0% ±3/2>+10.6% ±5/2>                         |
|              | 416.5 | 69.1% ±11/2>+7.3% ±9/2>+6.5% ±7/2>+5.7% ±3/2>+5.3% ±5/2>    |
|              | 462.2 | 30.7% ±3/2>+27.2% ±5/2>+18.0% ±7/2>+11.1% ±11/2>+6.7% ±1/2> |
|              | 515.9 | 41.4% ±9/2>+18.7% ±7/2>+16.5% ±5/2>+13.8% ±1/2>+4.7% ±3/2>  |
|              | 607.2 | 29.5% ±7/2>+24.5% ±9/2>+19.2% ±5/2>+10.4% ±3/2>+9.1% ±1/2>  |
|              | 740.2 | 24.7% ±7/2>+19.4% ±5/2>+17.3% ±9/2>+16.6% ±3/2>+14.7% ±1/2> |
| <b>1_Dy2</b> | 0.0   | 96.1% ±15/2>                                                |
|              | 191.9 | 83.8% ±13/2>+5.1% ±1/2>+3.3% ±5/2>                          |
|              | 247.5 | 46.7% ±1/2>+29.7% ±3/2>+9.8% ±13/2>+8.9% ±5/2>              |
|              | 378.3 | 57.6% ±11/2>+12.4% ±9/2>+8.9% ±5/2>+7.2% ±1/2>+6.6% ±3/2>   |
|              | 430.0 | 28.5% ±3/2>+22.3% ±7/2>+20.6% ±5/2>+17.9% ±11/2>+5.4% ±1/2> |
|              | 476.4 | 37.9% ±9/2>+21.6% ±5/2>+20.7% ±7/2>+7.9% ±1/2>+6.2% ±11/2>  |
|              | 569.3 | 24.8% ±9/2>+24.7% ±7/2>+17.1% ±5/2>+13.5% ±1/2>+12.0% ±3/2> |
|              | 711.0 | 24.9% ±7/2>+19.6% ±5/2>+17.5% ±9/2>+16.2% ±3/2>+14.2% ±1/2> |
| <b>1_Dy3</b> | 0.0   | 95.9% ±15/2>                                                |
|              | 190.6 | 84.8% ±13/2>+4.2% ±9/2>+3.9% ±1/2>                          |
|              | 235.7 | 45.1% ±1/2>+27.9% ±3/2>+12.4% ±5/2>+9.4% ±13/2>             |
|              | 388.4 | 67.7% ±11/2>+8.1% ±7/2>+7.5% ±9/2>+5.4% ±3/2>+4.3% ±5/2>    |
|              | 438.8 | 27.3% ±3/2>+27.2% ±5/2>+16.6% ±7/2>+12.8% ±11/2>+8.8% ±1/2> |
|              | 496.1 | 42.3% ±9/2>+16.1% ±7/2>+13.6% ±5/2>+13.4% ±1/2>+8.4% ±3/2>  |
|              | 590.1 | 29.7% ±7/2>+23.6% ±9/2>+20.4% ±5/2>+10.1% ±3/2>+8.7% ±1/2>  |
|              | 700.2 | 24.9% ±7/2>+20.4% ±5/2>+17.8% ±3/2>+15.9% ±1/2>+15.3% ±9/2> |

|              |       |                                                                          |
|--------------|-------|--------------------------------------------------------------------------|
| <b>2_Dy1</b> | 0.0   | 98.4% ±15/2>                                                             |
|              | 188.6 | 37.3% ±13/2>+17.7% ±9/2>+13.4% ±7/2>+11.3% ±5/2>+11.2% ±11/2>            |
|              | 297.9 | 43.7% ±13/2>+14.7% ±7/2>+14.5% ±3/2>+14.4% ±11/2>+7.4% ±1/2>             |
|              | 376.1 | 25.6% ±5/2>+23.9% ±11/2>+15.3% ±1/2>+12.8% ±9/2>+10.7% ±13/2>+8.1% ±7/2> |
|              | 486.6 | 27.9% ±11/2>+26.8% ±3/2>+19.9% ±9/2>+11.1% ±1/2>+5.8% ±5/2>              |
|              | 581.7 | 47.7% ±1/2>+20.5% ±3/2>+11.4% ±9/2>+9.0% ±7/2>+6.5% ±5/2>                |
|              | 695.3 | 27.4% ±7/2>+22.8% ±9/2>+22.2% ±5/2>+12.0% ±11/2>+9.9% ±3/2>              |
|              | 791.6 | 24.5% ±5/2>+22.3% ±7/2>+19.4% ±3/2>+13.8% ±9/2>+12.9% ±1/2>              |
| <b>2_Dy2</b> | 0.0   | 97.7% ±15/2>                                                             |
|              | 67.6  | 80.1% ±13/2>+17.2% ±11/2>                                                |
|              | 158.0 | 24.5% ±11/2>+20.9% ±9/2>+14.9% ±1/2>+14.5% ±3/2>+10.0% ±5/2>+8.7% ±7/2>  |
|              | 200.6 | 26.2% ±11/2>+21.6% ±9/2>+14.5% ±1/2>+10.8% ±3/2>+10.0% ±7/2>+8.8% ±13/2> |
|              | 250.4 | 29.0% ±5/2>+25.3% ±7/2>+18.2% ±3/2>+11.4% ±1/2>+8.0% ±11/2>              |
|              | 317.9 | 28.4% ±9/2>+22.1% ±7/2>+18.0% ±1/2>+13.1% ±11/2>+11.9% ±3/2>             |
|              | 366.3 | 27.2% ±5/2>+19.1% ±7/2>+18.0% ±3/2>+14.7% ±1/2>+13.8% ±9/2>              |
|              | 569.5 | 26.5% ±3/2>+26.0% ±1/2>+22.0% ±5/2>+14.6% ±7/2>+8.0% ±9/2>               |
| <b>2_Dy3</b> | 0.0   | 98.3% ±15/2>                                                             |
|              | 264.1 | 95.2% ±13/2>                                                             |
|              | 448.9 | 34.5% ±11/2>+27.3% ±1/2>+15.4% ±3/2>+13.6% ±5/2>                         |
|              | 477.2 | 51.4% ±11/2>+18.8% ±3/2>+16.4% ±1/2>+6.1% ±7/2>                          |
|              | 556.9 | 26.3% ±9/2>+25.9% ±5/2>+19.7% ±7/2>+11.9% ±3/2>+9.2% ±1/2>               |
|              | 604.5 | 49.5% ±9/2>+23.5% ±7/2>+9.8% ±3/2>+9.2% ±5/2>                            |

|  |       |                                                                                                                         |
|--|-------|-------------------------------------------------------------------------------------------------------------------------|
|  | 692.7 | $35.4\% \pm 7/2\rangle + 25.4\% \pm 5/2\rangle + 13.1\% \pm 3/2\rangle + 12.2\% \pm 9/2\rangle + 12.1\% \pm 1/2\rangle$ |
|  | 812.6 | $33.1\% \pm 1/2\rangle + 30.9\% \pm 3/2\rangle + 23.1\% \pm 5/2\rangle + 10.8\% \pm 7/2\rangle$                         |

To fit the exchange interactions between Dy<sup>III</sup> ions in complexes **1** and **2**, we took two steps to obtain them. Firstly, we calculated individual Dy<sup>III</sup> fragments using CASSCF/RASSI-SO to obtain the corresponding magnetic properties. Then, the exchange interaction between the magnetic centers was considered within the Lines model,<sup>S8</sup> while the account of the dipole-dipole magnetic coupling is treated exactly. The Lines model is effective and has been successfully used widely in the research field of *d* and *f*-elements single-molecule magnets.<sup>S9–S10</sup>

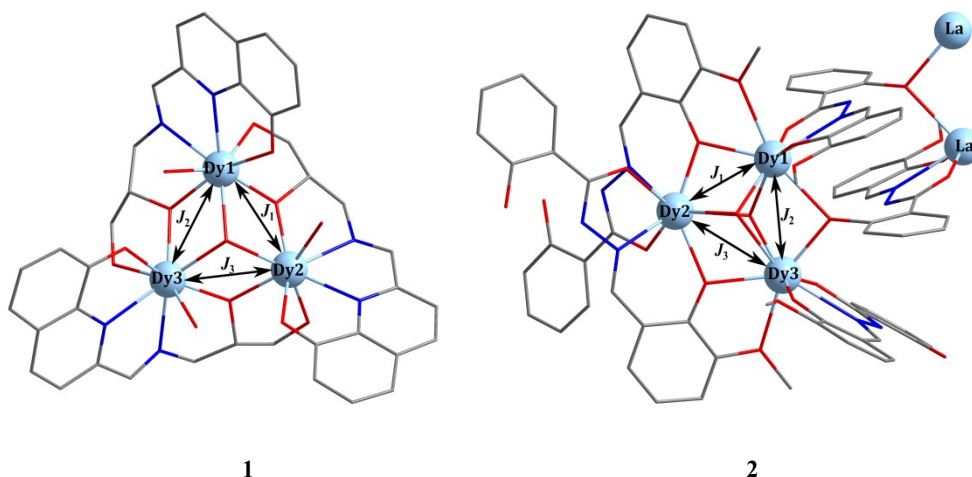

**Figure S10.** Scheme of the Dy<sup>III</sup>-Dy<sup>III</sup> interactions in complexes **1** and **2**.

The Ising exchange Hamiltonian for **1** and **2** is:

$$\hat{H}_{exch} = -\tilde{J}_1 \hat{S}_{Dy1} \hat{S}_{Dy2} - \tilde{J}_2 \hat{S}_{Dy1} \hat{S}_{Dy3} - \tilde{J}_3 \hat{S}_{Dy2} \hat{S}_{Dy3} \quad (S1)$$

The  $\tilde{J}_1 = 25 \cos \varphi J_1$ , where  $\varphi$  is the angle between the anisotropy axes on sites Dy1 and Dy2, and  $J_1$  is the Lines exchange coupling parameter. The other two interactions  $\tilde{J}_2$  and  $\tilde{J}_3$  also have similar expressions. The  $S_{Dy}^z = 1/2$  is the ground pseudospin on the Dy<sup>III</sup> site. The total  $\tilde{J}_{total}$  is the parameter of the total magnetic interaction (

$\tilde{J}_{total} = \tilde{J}_{dipolar} + \tilde{J}_{exchange}$ ) between magnetic center ions. The dipolar magnetic couplings can be calculated exactly, while the Lines exchange coupling constants were fitted through comparison of the computed and measured magnetic susceptibilities using the POLY\_ANISO program.<sup>S5-S7</sup>

**Table S10.** Exchange energies  $E$  ( $\text{cm}^{-1}$ ), the transversal magnetic moments  $\Delta_t$  ( $\mu_B$ ) and the main values of the  $g_z$  for the lowest four exchange doublets of complexes **1** and **2**.

| exchange doublets | <b>1</b>       |                        |        | <b>2</b>       |                        |        |
|-------------------|----------------|------------------------|--------|----------------|------------------------|--------|
|                   | $E$            | $\Delta_t$             | $g_z$  | $E$            | $\Delta_t$             | $g_z$  |
| 1                 | 0.000000000000 | $1.883 \times 10^{-5}$ | 33.253 | 0.000000000000 | $7.095 \times 10^{-7}$ | 22.885 |
|                   | 0.000000000000 |                        |        | 0.000000000001 |                        |        |
| 2                 | 0.749731966952 | $7.809 \times 10^{-4}$ | 33.692 | 0.105473387695 | $3.036 \times 10^{-6}$ | 27.102 |
|                   | 0.749731966952 |                        |        | 0.105473387695 |                        |        |
| 3                 | 1.156329769108 | $4.046 \times 10^{-2}$ | 34.067 | 3.967808456075 | $5.608 \times 10^{-7}$ | 34.085 |
|                   | 1.156329769108 |                        |        | 3.967808456076 |                        |        |
| 4                 | 1.207341178666 | $3.076 \times 10^{-2}$ | 33.893 | 5.321243172509 | $4.841 \times 10^{-8}$ | 47.477 |
|                   | 1.207341178666 |                        |        | 5.321243172510 |                        |        |

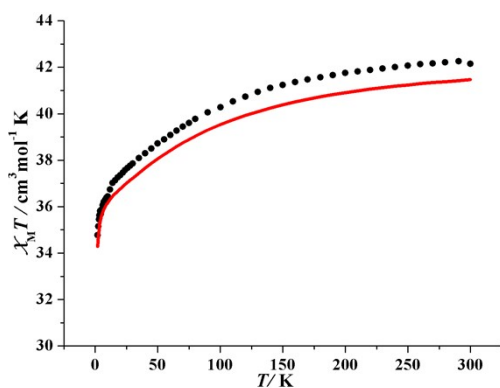

**1**

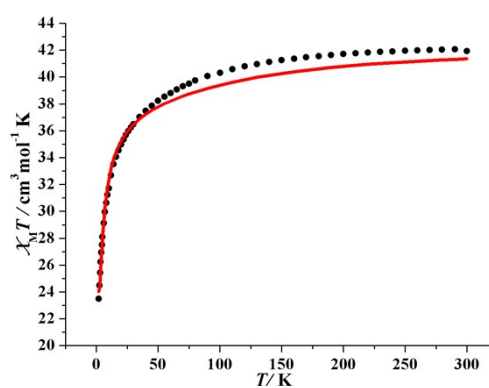

**2**

**Figure S11.** Calculated (red solid line) and experimental (black circle dot) data of magnetic susceptibilities of complexes **1** and **2**. The intermolecular interaction parameters  $zJ'$  of **1** and **2** were fitted to  $-0.01$  and  $0.08 \text{ cm}^{-1}$ , respectively.

| <b>1_Dy1</b>                                                           | <b>1_Dy2</b> | <b>1_Dy3</b> | <b>2_Dy1</b> | <b>2_Dy2</b> | <b>2_Dy3</b> |
|------------------------------------------------------------------------|--------------|--------------|--------------|--------------|--------------|
| Tilted angle between anisotropy axis and the tangential direction(° )  |              |              |              |              |              |
| 33.20                                                                  | 26.75        | 22.07        | 80.32        | 0.53         | 26.75        |
| Tilted angle between anisotropy axis and the Dy <sub>3</sub> plane(° ) |              |              |              |              |              |
| 36.35                                                                  | 39.07        | 35.58        | 85.63        | 2.15         | 69.19        |

**Table S11.** Selected angle with anisotropic axis of complexes **1** and **2**.

## References:

- S1 F. Aquilante, J. Autschbach, R. K. Carlson, L. F. Chibotaru, M. G. Delcey, L. De Vico, I. F. Galván, N. Ferré, L. M. Frutos, L. Gagliardi, M. Garavelli, A. Giussani, C. E. Hoyer, G. Li Manni, H. Lischka, D. Ma, P. Å. Malmqvist, T. Müller, A. Nenov, M. Olivucci, T. B. Pedersen, D. Peng, F. Plasser, B. Pritchard, M. Reiher, I. Rivalta, I. Schapiro, J. Segarra-Martí, M. Stenrup, D. G. Truhlar, L. Ungur, A. Valentini, S. Vancoillie, V. Veryazov, V. P. Vysotskiy, O. Weingart, F. Zapata and R. Lindh, *J. Comput. Chem.* 2016, **37**, 506–541.
- S2 L. Seijo, Z. Barandiarán, *Computational Chemistry: Reviews of Current Trends*; World Scientific, Inc.: Singapore, 1999; pp 455.
- S3 P. Å. Malmqvist, B. O. Roos, B. Schimmelpfennig, *Chem. Phys. Lett.*, 2002, **357**, 230–240.
- S4 B. A. Heß, C. M. Marian, U. Wahlgren, O. Gropen, *Chem. Phys. Lett.*, 1996, **251**, 365–371.
- S5 L. F. Chibotaru, L. Ungur, A. Soncini, *Angew. Chem., Int. Ed.* 2008, **47**, 4126–4129.
- S6 L. Ungur, W. Van den Heuvel, L. F. Chibotaru, *New J. Chem.* 2009, **33**, 1224–1230.

- S7 L. F. Chibotaru, L. Ungur, C. Aronica, H. Elmoll, G. Pilet, D. Luneau, *J. Am. Chem. Soc.* 2008, **130**, 12445–12455.
- S8 M. E. Lines, *J. Chem. Phys.* 1971, **55**, 2977–2984.
- S9 K. C. Mondal, A. Sundt, Y. H. Lan, G. E. Kostakis, O. Waldmann, L. Ungur, L. F. Chibotaru, C. E. Anson, A. K. Powell, *Angew. Chem., Int. Ed.* 2012, **51**, 7550–7554.
- S10 Langley, S. K.; Wielechowski, D. P.; Vieru, V.; Chilton, N. F.; Moubaraki, B.; Abrahams, B. F.; Chibotaru, L. F.; Murray, K. S. *Angew. Chem., Int. Ed.* **2013**, *52*, 12014–12019.
